# Supplementary material
Source: HighWire-hosted journal article supplement (https://www.cmajopen.ca/highwire/filestream/84651/field_highwire_adjunct_files/0/2020-0064-1-at.pdf)
Supplement: 2020-0064-1-at.pdf [file 2020-0064-1-at.pdf]

## Appendix 1 (as supplied by the authors)

Items adapted from the Childhood Experiences of Violence Questionnaire (CEVQ)

|         |                                                                                                                                                                                               |
|---------|-----------------------------------------------------------------------------------------------------------------------------------------------------------------------------------------------|
| Item 1  | Before age 16, how many times did any one of your parents, step-parents or guardians swear at you, or say hurtful, insulting things that made you feel like you were not wanted or loved?     |
| Item 2  | Before age 16, how many times did you see or hear any one of your parents, step-parents or guardians hit each other or another adult in your home? By adult, I mean anyone 18 years and over. |
| Item 3  | Before age 16, how many times did a parent or caregiver spank you with their hand on your bottom (bum), or slap you on your hand?                                                             |
| Item 4  | Before age 16, how many times did an adult slap you on the face, head or ears or hit or spank you with something hard to hurt you?                                                            |
| Item 5  | Before age 16, how many times did an adult push, grab, shove or throw something at you to hurt you?                                                                                           |
| Item 6  | Before age 16, how many times did an adult kick, bite, punch, choke, burn you, or physically attack you in some way?                                                                          |
| Item 7  | Before age 16, how many times did your parents, step-parents or guardians not take care of your basic needs, such as keeping you clean or providing food or clothing?                         |
| Item 8  | Before age 16, how many times did an adult force you or attempt to force you into any unwanted sexual activity, by threatening you, holding you down or hurting you in some way?              |
| Item 9  | Before age 16, how many times did an adult touch you against your will in any sexual way? By this, I mean anything from unwanted touching or grabbing, to kissing or fondling.                |
| Item 10 | Before age 16, did you ever see or talk to the police or anyone from child protective services about any of the things you mentioned?                                                         |
| Item 11 | Before age 16, how many times did you see or hear any one of your parents, step-parents or guardians say hurtful or mean things to each other or to another adult in your home?               |
| Item 12 | Did you ever experience the death or serious illness of a parent or a primary caretaker?                                                                                                      |
| Item 13 | Did you experience the divorce or separation of your parents?                                                                                                                                 |
| Item 14 | Did anyone in your family ever suffer from mental or psychiatric illness or have a “breakdown”?                                                                                               |

**Supplementary Table 1: Unadjusted weighted prevalence estimates of adverse childhood experiences by age groups and sex**

|                          | Total Sample    | Total          |                | Ages 45-54<br>(Birth cohort<br>1960-1969) |                | Ages 55-64<br>(Birth cohort<br>1950-1959) |                | Ages 65-74<br>(Birth cohort<br>1940-1949) |                | Ages 75-85<br>(Birth cohort<br>1930-1939) |                |
|--------------------------|-----------------|----------------|----------------|-------------------------------------------|----------------|-------------------------------------------|----------------|-------------------------------------------|----------------|-------------------------------------------|----------------|
|                          |                 | Male           | Female         | Male                                      | Female         | Male                                      | Female         | Male                                      | Female         | Male                                      | Female         |
| <b>ACEs Index, n (%)</b> |                 |                |                |                                           |                |                                           |                |                                           |                |                                           |                |
| 0                        | 16253<br>(38.4) | 8236<br>(40.6) | 8017<br>(36.3) | 1075<br>(37.1)                            | 1004<br>(30.6) | 2485<br>(38.8)                            | 2440<br>(33.7) | 2517<br>(42.6)                            | 2314<br>(36.9) | 2159<br>(46.5)                            | 2259<br>(47.3) |
| 1                        | 11455<br>(26.0) | 5842<br>(26.8) | 5613<br>(25.2) | 805<br>(24.8)                             | 774<br>(21.8)  | 1808<br>(26.1)                            | 1816<br>(24.5) | 1827<br>(28.4)                            | 1654<br>(26.4) | 1402<br>(28.5)                            | 1369<br>(28.4) |
| 2                        | 6289<br>(15.5)  | 3078<br>(15.3) | 3211<br>(15.7) | 488<br>(16.8)                             | 510<br>(17.6)  | 1046<br>(15.5)                            | 1167<br>(16.0) | 918<br>(14.6)                             | 946<br>(15.9)  | 626<br>(13.8)                             | 588<br>(12.8)  |
| 3                        | 3827<br>(9.4)   | 1814<br>(9.2)  | 2013<br>(9.6)  | 335<br>(10.4)                             | 368<br>(11.6)  | 648<br>(10.1)                             | 784<br>(10.6)  | 546<br>(8.1)                              | 584<br>(9.0)   | 285<br>(7.0)                              | 277<br>(6.0)   |
| 4                        | 2293<br>(5.6)   | 931<br>(4.6)   | 1362<br>(6.6)  | 188<br>(5.9)                              | 258<br>(8.4)   | 371<br>(5.3)                              | 583<br>(7.9)   | 259<br>(3.7)                              | 382<br>(5.9)   | 113<br>(2.4)                              | 139<br>(2.9)   |
| 5                        | 1247<br>(3.0)   | 452<br>(2.2)   | 795<br>(3.9)   | 95<br>(2.8)                               | 166<br>(5.1)   | 187<br>(2.6)                              | 335<br>(4.2)   | 122<br>(1.8)                              | 221<br>(3.9)   | 48<br>(1.0)                               | 73<br>(1.6)    |
| 6                        | 575<br>(1.5)    | 190<br>(1.1)   | 385<br>(1.9)   | 47<br>(1.7)                               | 94<br>(3.0)    | 84<br>(1.4)                               | 172<br>(2.2)   | 38<br>(0.6)                               | 78<br>(1.4)    | 21<br>(0.6)                               | 41<br>(0.9)    |
| 7                        | 206<br>(0.5)    | 51<br>(0.2)    | 155<br>(0.8)   | 20<br>(0.5)                               | 42<br>(1.6)    | 14<br>(0.2)                               | 63<br>(0.8)    | 12<br>(0.2)                               | 41<br>(0.6)    | 5<br>(0.1)                                | 9<br>(0.1)     |
| 8                        | 41<br>(0.1)     | 11<br>(0.1)    | 30<br>(0.2)    | 5<br>(0.1)                                | 8<br>(0.2)     | 2<br>(0.0)                                | 14<br>(0.2)    | 3<br>(0.0)                                | 6<br>(0.1)     | 1<br>(0.0)                                | 2<br>(0.0)     |

n reflects the number of individuals in the sample.

Sum of prevalence of the categories do not add up to 100 since they are not mutually exclusive

**Supplementary Table 2: Age and sex adjusted weighted prevalence of adverse childhood experiences by province**

| Province                              | Physical abuse       | Sexual abuse         | Emotional abuse      | Neglect           | Exposure to intimate partner violence | Parental death       | Parental divorce or separation | Living with a family member with mental health problems |
|---------------------------------------|----------------------|----------------------|----------------------|-------------------|---------------------------------------|----------------------|--------------------------------|---------------------------------------------------------|
| Newfoundland & Labrador<br>(n = 2884) | 19.2<br>(17.7, 20.9) | 12.7<br>(11.3, 14.3) | 12.5<br>(11.2, 14.0) | 1.8<br>(1.4, 2.4) | 14.1<br>(12.7, 15.6)                  | 16.5<br>(15.0, 18.1) | 4.0<br>(3.3, 4.9)              | 15.1<br>(13.7, 16.6)                                    |
| PEI<br>(n = 876)                      | 21.0<br>(18.0, 24.4) | 12.0<br>(9.6, 14.9)  | 20.0<br>(17.2, 23.3) | 2.8<br>(1.8, 4.4) | 18.5<br>(15.7, 21.8)                  | 17.8<br>(15.1, 20.8) | 7.2<br>(5.5, 9.4)              | 16.4<br>(13.7, 19.4)                                    |
| Nova Scotia<br>(n = 4010)             | 24.7<br>(23.2, 26.3) | 12.6<br>(11.4, 13.9) | 21.9<br>(20.4, 23.4) | 3.6<br>(3.0, 4.3) | 21.5<br>(20.1, 23.1)                  | 16.0<br>(14.8, 17.3) | 9.6<br>(8.6, 10.7)             | 19.1<br>(17.7, 20.5)                                    |
| New Brunswick<br>(n = 1063)           | 20.5<br>(17.9, 23.4) | 16.4<br>(13.9, 19.2) | 16.7<br>(14.3, 19.4) | 3.0<br>(2.0, 4.4) | 16.2<br>(13.7, 18.9)                  | 15.7<br>(13.4, 18.3) | 7.6<br>(6.0, 9.6)              | 17.7<br>(15.2, 20.4)                                    |
| Quebec<br>(n = 8546)                  | 21.6<br>(20.6, 22.6) | 15.5<br>(14.6, 16.4) | 16.0<br>(15.1, 17.0) | 3.5<br>(3.1, 4.0) | 16.7<br>(15.8, 17.7)                  | 19.3<br>(18.3, 20.2) | 7.6<br>(7.0, 8.3)              | 20.6<br>(19.6, 21.6)                                    |
| Ontario<br>(n = 9831)                 | 26.1<br>(25.2, 27.1) | 14.4<br>(13.6, 15.2) | 20.7<br>(19.8, 21.7) | 2.8<br>(2.4, 3.1) | 21.8<br>(20.9, 22.7)                  | 15.3<br>(14.6, 16.2) | 10.0<br>(9.4, 10.7)            | 21.7<br>(20.8, 22.6)                                    |
| Manitoba<br>(n = 3978)                | 25.2<br>(23.7, 26.8) | 13.2<br>(12.0, 14.6) | 21.8<br>(20.4, 23.3) | 3.1<br>(2.6, 3.7) | 22.5<br>(21.0, 24.0)                  | 15.4<br>(14.2, 16.7) | 9.4<br>(8.4, 10.5)             | 21.4<br>(20.0, 22.9)                                    |
| Saskatchewan<br>(n = 1063)            | 21.9<br>(19.2, 24.8) | 13.1<br>(10.7, 15.9) | 18.7<br>(16.1, 21.7) | 2.4<br>(1.6, 3.7) | 17.9<br>(15.3, 20.9)                  | 14.1<br>(11.8, 16.8) | 6.1<br>(4.7, 8.0)              | 16.9<br>(14.5, 19.6)                                    |
| Alberta<br>(n = 4490)                 | 25.1<br>(23.7, 26.6) | 11.5<br>(10.3, 12.8) | 23.7<br>(22.2, 25.2) | 2.4<br>(1.9, 3.0) | 23.3<br>(21.9, 24.9)                  | 14.3<br>(13.1, 15.5) | 10.9<br>(9.8, 12.0)            | 19.8<br>(18.4, 21.2)                                    |
| British Columbia<br>(n = 8073)        | 31.8<br>(30.6, 32.9) | 16.7<br>(15.7, 17.7) | 23.8<br>(22.8, 24.9) | 4.1<br>(3.6, 4.6) | 24.0<br>(22.9, 25.1)                  | 13.8<br>(12.9, 14.7) | 13.0<br>(12.2, 13.8)           | 21.5<br>(20.5, 22.5)                                    |

Values presented in parenthesis are 95% confidence interval
